# Supplementary material for: Chemical characterization of automobile windshield glass samples by nuclear and radio-analytical techniques namely SEM-EDX, ED-XRF, PIXE, PIGE, and INAA and potential of external (in air) PIGE and INAA in conjunction with chemometrics for glass forensics
Source: Royal Society of Chemistry journal article supplement (doi:10.1039/d3ja00006k), 2023-01-01
Supplement: d3ja00006k1.pdf [file d3ja00006k1.pdf]

## Electronic Supplementary Information

**Chemical characterization of automobile windshield glass samples by nuclear and radio-analytical techniques namely SEM-EDX, ED-XRF, PIXE, PIGE and INAA and potentials of external (in air) PIGE and INAA in conjunction with chemometrics for glass forensics**

**Vishal Sharma<sup>a,b,\*</sup>, Raghunath Acharya<sup>b,d,\*</sup>, Arnab Sarkar<sup>c,d</sup>, Hemlata K. Bagla<sup>a</sup> and Pradeep Kumar Pujari<sup>b,d</sup>**

<sup>a.</sup> Department of Nuclear and Radiochemistry, Kishinchand Chellaram College, Mumbai 400020, India

<sup>b.</sup> Radiochemistry Division, Bhabha Atomic Research Centre, Mumbai 400085, India

<sup>c.</sup> Fuel Chemistry Division, Bhabha Atomic Research Centre, Mumbai 400085, India

<sup>d.</sup> Homi Bhabha National Institute, Anushaktinagar, Mumbai 400094, India

(\* Corresponding Authors Emails: [racharya@barc.gov.in](mailto:racharya@barc.gov.in)/[racharyabarc@gmail.com](mailto:racharyabarc@gmail.com) /[sharmaempire@gmail.com](mailto:sharmaempire@gmail.com))

---

### Supplementary Tables captions:

**Table S1.** Details of automobile (car) windshield glass samples analyzed for forensic studies

**Table S2.** Relevant thick target gamma-ray yields (Counts/ $\mu\text{C}/\text{Sr}$ ) of proton induced reactions of low Z elements

**Table S3.** Relevant nuclear data of elements for INAA of glass samples

**Table S4.** k-Means clustering table using k=6 as initial clustering

### Supplementary Figure Caption:

**Figure S1.** Ternary plot of five automobile glass samples utilizing REEs sum, transition sum and major elemental concentration sum (Sample A3(G1), A30 (G2), A33 (G3), A45 (G4), A46 (G5))

**Table S1. Details of automobile (car) windshield glass samples analyzed for forensic studies**

| Glass ID | Manufacture of Car | Model  | Year | Remark      |
|----------|--------------------|--------|------|-------------|
| A1       | Mazda              | Lantis | 1997 | Left/Front  |
| A2       | Mazda              | Lantis | 1997 | Left/Back   |
| A3       | Mazda              | Lantis | 1997 | Right/Back  |
| A4       | Peugeot            | 206    | 2001 | Right/Front |
| A5       | Peugeot            | 206    | 2001 | Left/front  |
| A6       | Mazda              | Lantis | 1997 | Right/Front |
| A7       | Hyundai            | Accent | 1999 | Right/Back  |

|     |            |         |      |             |
|-----|------------|---------|------|-------------|
| A8  | Honda      | Civic   | 1993 | Right/Front |
| A9  | Honda      | Civic   | 1993 | Left/Back   |
| A10 | Ford       | Focus   | 2002 | Left/Front  |
| A11 | Honda      | Civic   | 1993 | Right/Back  |
| A12 | Daewoo     | Lanos   | 2000 | Right/Back  |
| A13 | Hyundai    | Accent  | 1999 | Left/Back   |
| A14 | Peugeot    | 206     | 2001 | Right/back  |
| A15 | Ford       | Focus   | 2002 | Left/Back   |
| A16 | Hyundai    | Elantra | 1998 | Right/Back  |
| A17 | Hyundai    | Elantra | 1998 | Left/Back   |
| A18 | Honda      | Civic   | 1993 | Left/Front  |
| A19 | Hyundai    | Elantra | 1998 | Right/Front |
| A20 | Fiat       | Punto   | 2000 | Left/Back   |
| A21 | Hyundai    | Accent  | 1997 | Left/Back   |
| A22 | Daewoo     | Lanos   | 2000 | Right/Front |
| A23 | Daewoo     | Lanos   | 2000 | Left/Back   |
| A24 | Mitsubishi | Pajero  | 1998 | left/front  |
| A25 | Subaru     | Impreza | 1994 | right/front |
| A26 | Mitsubishi | Pajero  | 1998 | left/back   |
| A27 | Fiat       | Punto   | 2001 | left/front  |
| A28 | Subaru     | Impreza | 1994 | left/front  |
| A29 | Renault    | Clio    | 1995 | right/back  |
| A30 | Ford       | Focus   | 2002 | right/back  |
| A31 | Hyundai    | Accent  | 2001 | right/back  |
| A32 | Hyundai    | Accent  | 2001 | right/back  |
| A33 | Hyundai    | Accent  | 2001 | right/back  |
| A34 | Hyundai    | Accent  | 2001 | left/back   |
| A35 | Hyundai    | Accent  | 1997 | right/front |
| A36 | Hyundai    | Accent  | 1997 | left/back   |
| A37 | Ford       | Focus   | 2002 | right/front |
| A38 | Hyundai    | Accent  | 1997 | right/back  |
| A39 | Renault    | Clio    | 1995 | left/back   |
| A40 | Subaru     | Impreza | 1994 | left/back   |
| A41 | Fiat       | Punto   | 2001 | right/back  |
| A42 | Renault    | Clio    | 1995 | left/back   |
| A43 | Fiat       | Punto   | 2001 | right/front |
| A44 | Hyundai    | Accent  | 2001 | left/front  |
| A45 | Subaru     | Impreza | 1994 | right/back  |
| A46 | Renault    | Clio    | 1995 | right/back  |
| A47 | Renault    | Clio    | 1995 | right/front |
| A48 | Hyundai    | Accent  | 1997 | right/back  |

**Table S2. Relevant thick target gamma-ray yields (Counts/ $\mu$ C/Sr) of proton induced reactions of low Z elements [1]**

| Element | Reaction                                             | E $\gamma$ (keV) | Yield (Counts/ $\mu$ C/Sr) at 4 MeV proton |
|---------|------------------------------------------------------|------------------|--------------------------------------------|
| Li*     | ${}^7\text{Li} (p, p' \gamma) {}^7\text{Li}$         | 478              | $8.1 \times 10^7$                          |
|         | ${}^7\text{Li} (p, n \gamma) {}^7\text{Be}$          | 429              | $2.6 \times 10^7$                          |
| Na      | ${}^{23}\text{Na} (p, p' \gamma) {}^{23}\text{Na}$   | 440              | $3.9 \times 10^7$                          |
|         | ${}^{23}\text{Na} (p, p' \gamma) {}^{23}\text{Na}$   | 1636             | $2.6 \times 10^7$                          |
| Mg      | ${}^{24}\text{Mg} (p, p' \gamma) {}^{24}\text{Mg}$   | 585              | $1.2 \times 10^6$                          |
|         | ${}^{24}\text{Mg} (p, p' \gamma) {}^{24}\text{Mg}$   | 1368.5           | $6.5 \times 10^6$                          |
| Al      | ${}^{27}\text{Al} (p, p' \gamma) {}^{27}\text{Al}$   | 844              | $7.5 \times 10^6$                          |
|         | ${}^{27}\text{Al} (p, p' \gamma) {}^{27}\text{Al}$   | 1014             | $1.6 \times 10^7$                          |
| Si      | ${}^{28}\text{Si} (p, p' \gamma) {}^{28}\text{Si}$   | 1779             | $1.0 \times 10^7$                          |
|         | ${}^{29}\text{Si} (p, p' \gamma) {}^{29}\text{Si}$   | 1273             | $8.7 \times 10^5$                          |
| Ta*     | ${}^{181}\text{Ta} (p, p' \gamma) {}^{181}\text{Ta}$ | 136,<br>165      | # $1.6 \times 10^5$<br># $1.5 \times 10^3$ |

Note: \* - used as current normalizer; # thick target gamma-ray yield at 2.4 MeV proton beam [2]

**Table S3. Relevant nuclear data of elements for INAA of glass samples**

| Sr No. | Element | Activation Product  | Half life (T $_{1/2}$ ) | Gamma-ray Energy (keV) |
|--------|---------|---------------------|-------------------------|------------------------|
| 1      | Na      | ${}^{24}\text{Na}$  | 14.95 h                 | 1368.5                 |
| 2      | Al      | ${}^{28}\text{Al}$  | 2.24 min                | 1778                   |
| 3      | Ca      | ${}^{49}\text{Ca}$  | 8.7 min                 | 3084                   |
| 3      | Sc      | ${}^{46}\text{Sc}$  | 84 d                    | 889.6                  |
| 4      | Cr      | ${}^{51}\text{Cr}$  | 28 d                    | 320.4                  |
| 5      | Mn      | ${}^{56}\text{Mn}$  | 2.58 h                  | 847                    |
| 6      | Fe      | ${}^{59}\text{Fe}$  | 45 d                    | 1099                   |
| 7      | Co      | ${}^{60}\text{Co}$  | 5.27 y                  | 1173, 1332             |
| 8      | Zn      | ${}^{65}\text{Zn}$  | 244 d                   | 1115.9                 |
| 9      | Rb      | ${}^{86}\text{Rb}$  | 18.6 d                  | 1077.2                 |
| 10     | Zr      | ${}^{95}\text{Zr}$  | 64 d                    | 724, 757.1             |
| 11     | Cs      | ${}^{134}\text{Cs}$ | 751.9 d                 | 795                    |
| 13     | Ba      | ${}^{131}\text{Ba}$ | 11.8 d                  | 496                    |
| 14     | La      | ${}^{140}\text{La}$ | 1.67 d                  | 1596                   |
| 15     | Ce      | ${}^{141}\text{Ce}$ | 32 d                    | 145.6                  |
| 16     | Sm      | ${}^{153}\text{Sm}$ | 46.7 h                  | 103.2                  |
| 17     | Eu      | ${}^{152}\text{Eu}$ | 13.3 y                  | 1408                   |
| 18     | Yb      | ${}^{169}\text{Yb}$ | 32.03 d                 | 198                    |

|    |    |                   |       |                   |
|----|----|-------------------|-------|-------------------|
| 19 | Hf | <sup>181</sup> Hf | 42 d  | 482.5             |
| 20 | Ta | <sup>182</sup> Ta | 114 d | 1189.5,<br>1221.4 |
| 21 | Th | <sup>232</sup> Pa | 27d   | 312, 340.6        |

**Table S4.** k-Means clustering table using k=6 as initial clustering

| Cluster No. | Sample No. | Car Model No. | Cluster No. | Sample No. | Car Model No. |
|-------------|------------|---------------|-------------|------------|---------------|
| 1           | A01        | Mazda         | 5           | A07        | Hyundai       |
| 4           | A02        |               |             | A13        |               |
|             | A03        |               |             | A16        |               |
|             | A06        |               |             | A17        |               |
| 3           | A08        | Honda         |             | A19        |               |
|             | A09        |               | A21         |            |               |
|             | A18        |               | 2           | A12        | Daewoo        |
|             | A11        |               |             | A22        |               |
| 6           | A15        | A23           |             |            |               |
|             | A10        | A20           | Fiat        |            |               |

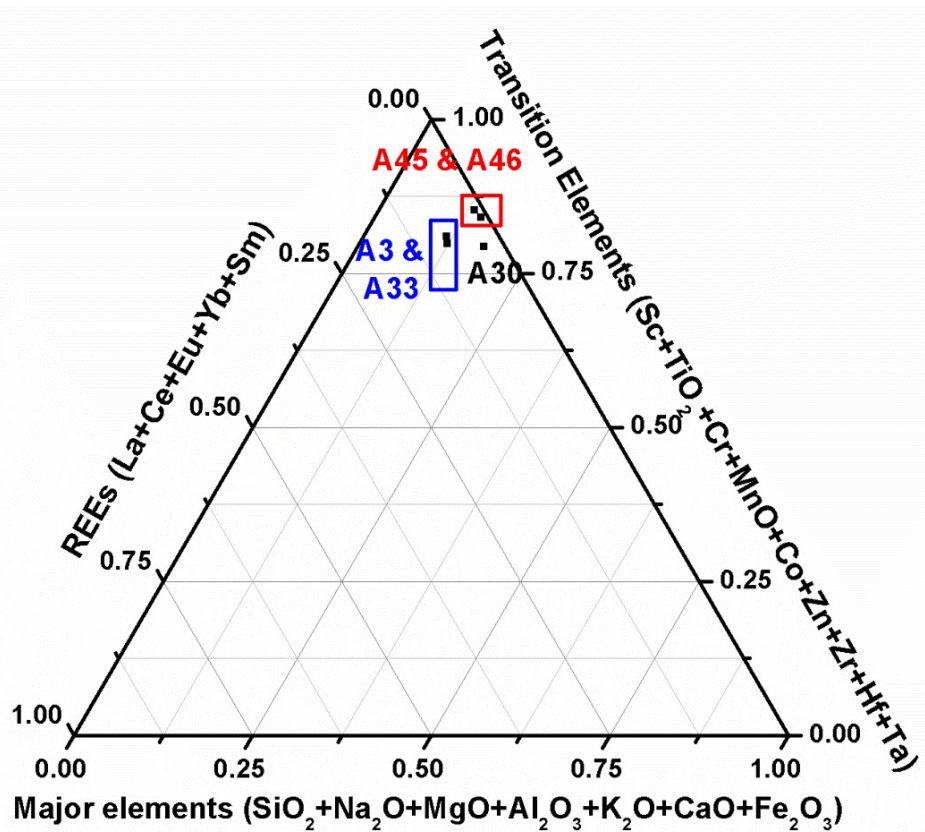

**Figure S1.** Ternary plot of five automobile glass samples utilizing REEs sum, transition sum and major elemental concentration sum (Sample A3(G1), A30 (G2), A33 (G3), A45 (G4), A46 (G5))

#### References:

1. A. Savidou, X. Aslanoglou, T. Paradellis, M. Pilakouta, Proton induced thick target  $\gamma$ -ray yields of light nuclei at the energy region  $E_p=1.0-4.1$  MeV, Nucl. Instr. Meth. B, 1999, 152, 12.
2. J. Raisanen, and R. Hanninen, Heavy element ( $Z>30$ ) thick target gamma-ray fields induced by 1.7 and 2.4 MeV protons, Nuclear Instruments and Methods 205 (1983) 259-268
